# Supplementary material for: Development, Validation, and Evaluation of a Simple Machine Learning Model to Predict Cirrhosis Mortality
Source: PubMed Central journal article supplement (PMC7610191; doi:10.1001/jamanetworkopen.2020.23780), 2020-11-03
Supplement: jamanetwopen-e2023780-s001.pdf [file jamanetwopen-e2023780-s001.pdf]

## Supplementary Online Content

Kanwal F, Taylor TJ, Kramer JR, et al. Development, validation, and evaluation of a simple machine learning model to predict cirrhosis mortality. *JAMA Netw Open*. 2020;3(11):e2023780. doi:10.1001/jamanetworkopen.2020.23780

**eMethods 1.** Cohort Index Date

**eMethods 2.** Imputation Approach

**eMethods 3.** Machine Learning Models

**eTable 1.** *ICD-9-CM* and *CPT* Codes and Drug Classes Used for Comorbidities Included in CirCom Score and Other Candidate Variables

**eTable 2.** Baseline Characteristics of 107 939 Patients With Cirrhosis

**eTable 3.** Sample Patients Profiles with 1- and 3-Year Mortality Based on Different Patient Characteristics

**eTable 4.** Scoring Intercepts and  $\beta$  Coefficients for Predictors in Final Model Predicting Mortality in Patients With Cirrhosis

**eFigure 1.** Discrimination Slopes for the Full Logistic With LASSO (Full Path LASS), Partial Path LASSO, and Gradient Boosting (XGB) Models

**eFigure 2.** Calibration Slopes for the Full Logistic With LASSO (Full Path LASS), Partial Path LASSO, and Gradient Boosting (XGB) Models

**eReferences.**

This supplementary material has been provided by the authors to give readers additional information about their work.

### **eMethods 1. Cohort Index Date**

Because we wanted to develop a model that can be used in ambulatory settings, we defined our index date (for follow up) as the date of the first clinic visit (regardless of cirrhosis diagnosis at this visit) at or after patients met cohort entry criteria. Therefore, for a patient with 2 outpatient ICD codes for cirrhosis or complications (coded at the time of outpatient clinic visits), the index date was the first of these 2 visits. For a patient with one inpatient code (entered at the time of discharge from hospital) followed by one outpatient code (entered at the time of outpatient clinic visit); the outpatient visit was the index date. However, for a patient who had one inpatient visit with ICD code for liver disease with drug, his/her index date was the first outpatient visit for any reason that occurred after s/he met these criteria.

## **eMethods 2. Imputation Approach**

To impute the missing data, we used a non-parametric machine learning based imputation strategy—MissForest—that may have better accuracy relative to other imputation strategies such as Multiple Imputation (e.g., Multiple Imputation through Chained Equations).<sup>1,2</sup>

MissForest predicts missing values through a series of non-parametric random forest tree ensembles. Briefly, the algorithm first makes an initial prediction of the missing value with a random forest fitting (first imputation iteration). Then, using the completely known data-matrix, a random-forest is trained with ( $y$ ) representing the complete values observed from the predictor that contains missing values overall. Then, the missing values in that predictor ( $y$ ) are predicted from the just-trained random forest model. This prediction is compared to the initial prediction of missingness. This process of training a new random forest on observed data plus the new predictions for the missing data and then making predictions of the truly missing data is repeated with a new prediction made until convergence. Convergence is assumed when the normalized root-mean-square-error (NRSME) of the prediction is minimized; when a new random forest prediction begins to increase the resulting NRMSE, the algorithm stops and the last random forest model predictions are used to impute the missing values.

One advantage of the MissForest approach is that a final dataset with a single prediction of the missing data values is the result. This makes MissForest more flexible for later machine learning methods like gradient boosting. In contrast, data-based multiple imputation methods require accounting for imputation of multiple datasets and then accounting for between-variance imputation. Accounting for between-imputation dataset variance in non-parametric machine learning models like gradient boosting remains unclear to the authors' knowledge.

### **eMethods 3. Machine Learning Models**

Gradient descent boosting creates a series of “boosted” decision trees of weaker predictors to create stronger final predictions. The final model was allowed to train up to 1,000 trees; however, optimization occurred at 127 trees. Additionally, a learning rate of 0.1 and a maximum depth of each tree of 7 (*i.e.*, up to 7-way interactions) were identified as optimal during training.

The LASSO performs variable selection by first evaluating the magnitude of each predictor in a prediction model including the full set of predictors and then for each variable in the range full set of predictors, it adds a penalty ( $\lambda$ ) to the prediction equation equal to the absolute value of smallest coefficient among all coefficients in the model at that stage of evaluation.<sup>3,4</sup> It then removes that variable and selects the remaining coefficients for the next iteration of penalty evaluation. This iterative loop continues until removal of predictors starts to increase prediction error. This process both selects the predictors that have the strongest influence on the outcome, while at the same time removes predictors that contribute little to the prediction. This facilitates a parsimonious prediction model that is more likely to be unbiased when predicting future data. Evaluating each predictor among all predictors available is customarily called the FULL pathway evaluation of predictors—as we refer to it here. We can also further constrain the prediction model to evaluate only a maximum number of most influential predictors (e.g., 10 or fewer predictors) and start the penalty process evaluation at the first iteration by selecting a penalty ( $\lambda$ ) that is equal to the absolute value of the 11<sup>th</sup> most strongly predictive variable and starting the iteration through the remaining predictors after imposing that  $\lambda$  penalty. This results in a PARTIAL pathway as we do not evaluate all other predictors than the 10 most strongly influential predictors at the first iteration of the LASSO algorithm.

**eTable 1.** ICD-9-CM and CPT Codes and Drug Classes Used for Comorbidities Included in CirCom Score and Other Candidate Variables

| <b>Cohort definition</b>                  |                                                                                                                                                                                                                    |
|-------------------------------------------|--------------------------------------------------------------------------------------------------------------------------------------------------------------------------------------------------------------------|
|                                           | <b>ICD-9-CM Codes</b>                                                                                                                                                                                              |
| Cirrhosis                                 | 571.2, 571.5, 571.6                                                                                                                                                                                                |
| Hepatocellular encephalopathy             | 070.71, 070.0, 070.2x, 070.4x, 070.6, 572.2, 348.3x                                                                                                                                                                |
| Ascites                                   | 789.5, 789.59                                                                                                                                                                                                      |
| Esophageal varices                        | 456.0, 456.1, 456.2x                                                                                                                                                                                               |
| HCC                                       | 155.0                                                                                                                                                                                                              |
| Spontaneous bacterial peritonitis         | 567.23                                                                                                                                                                                                             |
| Other decompensated cirrhosis             | 572.3, 572.4, 782.4, 572.8                                                                                                                                                                                         |
| <b>Candidate variables definitions</b>    |                                                                                                                                                                                                                    |
| CirCom Score:                             |                                                                                                                                                                                                                    |
| (1) Nonmetastatic solid cancer            | 140.x-154.x, 156.x-165.x, 170.x-172.x, 173.79, 174.x-195.x, 199.x                                                                                                                                                  |
| (2) Metastatic cancer                     | 196.x-198.x                                                                                                                                                                                                        |
| (3) Hematologic cancer                    | 200.x-208.x, 238.79, 273.3, 277.89                                                                                                                                                                                 |
| (4) Substance abuse other than alcoholism | 292.x, 304.x, 305.x                                                                                                                                                                                                |
| (5) Epilepsy                              | 345.x                                                                                                                                                                                                              |
| (6) Acute myocardial infarction           | 410.x, 429.79                                                                                                                                                                                                      |
| (7) Heart failure                         | 428.x                                                                                                                                                                                                              |
| (8) Peripheral arterial disease           | 440.x, 441.x, 443.81                                                                                                                                                                                               |
| (9) Chronic obstructive pulmonary disease | 490, 491.0, 491.x, 492.x, 493.2x, 496                                                                                                                                                                              |
| (10) Chronic kidney disease               | 585.x                                                                                                                                                                                                              |
| Depression                                | 296.2x, 296.3x, 293.83, 296.90, 296.99, 300.4, 309.0, 309.1, 311                                                                                                                                                   |
| Diabetes                                  | 249.x, 250.00, 250.02, 250.10, 250.12, 250.20, 250.22, 250.30, 250.32, 250.40, 250.42, 250.50, 250.52, 250.60, 250.62, 250.70, 250.72, 250.80, 250.82, 250.90, 250.92, 790.2x, 791.5, 791.6, V4585, V53.91, V65.46 |
| Anxiety                                   | 300.0x, 300.10, 300.2x, 300.3, 300.89, 300.9                                                                                                                                                                       |
| Severe infection:                         |                                                                                                                                                                                                                    |
| (1) Sepsis                                | 995.91, 995.92, 785.52, 038.x                                                                                                                                                                                      |

|                                                |                                                                                          |
|------------------------------------------------|------------------------------------------------------------------------------------------|
| (2) Infection                                  | 008.x, 009.x, 041.x, 480.x-487.x, 576.1                                                  |
| (3) Peritonitis                                | 567.0                                                                                    |
| (4) Cellulitis                                 | 681.x, 682.x                                                                             |
| Alcohol use                                    | 291.x, 303.x, 305.0x, 980.0, 357.5, 425.5, 535.3x, 790.3, V11.3                          |
| <b>Other therapies</b>                         | <b>CPT Codes</b>                                                                         |
| Endoscopic variceal ligation                   | 43244, 43205, 43400                                                                      |
| Paracentesis                                   | 49080-49083                                                                              |
| Transjugular intrahepatic portosystemic shunts | 37182, 37183, C1040, C5283                                                               |
| <b>Medication classes</b>                      | <b>Drug class codes</b>                                                                  |
| Antihypertensive                               | CV150, CV200, CV400, CV490, CV800, CV805, CV806                                          |
| Analgesics                                     | CN100-CN105                                                                              |
| Antibiotic                                     | AM000, AM110-AM120, AM150, AM200, AM250, AM300, AM350, AM400, AM550, AM600, AM650, AM700 |
| Anti-depressive                                | CN600, CN601, CN602, CN609                                                               |
| Betablocker                                    | CV100                                                                                    |
| Diuretic                                       | CV700-CV704, CV709                                                                       |

ICD-9, CPT, and Drug Class Codes Used to Define the Advanced Liver Disease Cohort and Candidate Predictor Variables CirCom score uses a specific set of ICD-10 codes. We mapped the ICD-10 to ICD-9 codes to define conditions included in CirCom.

**eTable 2. Baseline Characteristics of 107 939 Patients With Cirrhosis**

| <b>Characteristic</b>               | <b>Data</b>   |
|-------------------------------------|---------------|
| <b>Age in years, mean (SD)</b>      | 62.7 (9.6)    |
| <b>Race/ethnicity, N (%)</b>        |               |
| Black                               | 19852 (18.4)  |
| Hispanic                            | 6376 (5.9)    |
| White                               | 71563 (66.3)  |
| Other                               | 3005 (2.8)    |
| Missing                             | 7143 (6.6)    |
| <b>Sex, N (%)</b>                   |               |
| Female                              | 3623 (3.4)    |
| Male                                | 104316 (96.6) |
| <b>Marital status, N (%)</b>        |               |
| Divorced or separated               | 47981 (44.5)  |
| Married                             | 45792 (42.4)  |
| Single or never married             | 14020 (13.0)  |
| Missing                             | 146 (0.1)     |
| <b>Rural status, N (%)</b>          |               |
| Rural or highly rural               | 37140 (34.4)  |
| Urban                               | 69963 (64.8)  |
| Missing                             | 836 (0.8)     |
| <b>Means test, N (%)</b>            |               |
| Copay exempt                        | 30882 (28.6)  |
| No longer required                  | 40638 (37.7)  |
| Pending or missing                  | 14595 (13.5)  |
| Required                            | 21824 (20.2)  |
| <b>Etiology of cirrhosis, N (%)</b> |               |
| HCV infection alone                 | 14286 (13.2)  |
| HCV and alcohol                     | 26011 (24.1)  |

|                                                                                   |               |
|-----------------------------------------------------------------------------------|---------------|
| Alcohol alone                                                                     | 34112 (31.6)  |
| Non-alcoholic steatohepatitis                                                     | 29,140 (26.9) |
| HBV infection                                                                     | 3427 (3.2)    |
| <b>HCV, N (%)</b>                                                                 |               |
| HCV RNA + w/out SVR at index                                                      | 38708 (35.9)  |
| HCV RNA+ w/ SVR at index                                                          | 1589 (1.5)    |
| No HCV                                                                            | 67642 (62.7)  |
| <b>Aspartate aminotransferase/alanine aminotransferase (AST/ALT) ratio, N (%)</b> |               |
| <2                                                                                | 83797 (77.6)  |
| 2 or higher                                                                       | 13699 (12.7)  |
| missing                                                                           | 10443 (9.7)   |
| <b>Laboratory test results, mean (SD)</b>                                         |               |
| Sodium level, mEq/L                                                               | 137.7 (3.8)   |
| Creatinine level, mg/dL                                                           | 1.2 (1.0)     |
| Bilirubin level, mg/dL                                                            | 1.6 (2.7)     |
| INR                                                                               | 1.4 (1.1)     |
| Albumin level, g/dL                                                               | 3.5 (0.7)     |
| Platelet count, x 10 <sup>3</sup> /μL)                                            | 166.5 (92.7)  |
| AST level                                                                         | 68.3 (134.4)  |
| ALT level                                                                         | 60.2 (120.3)  |
| Hemoglobin level, g/dL                                                            | 13.0 (2.3)    |
| <b>Cirrhosis complications, N (%)</b>                                             |               |
| Hepatic encephalopathy                                                            | 21556 (20.0)  |
| Ascites                                                                           | 21770 (20.2)  |
| Varices (including variceal bleeding)                                             | 17631 (16.3)  |
| Hepatocellular cancer                                                             | 8150 (7.60)   |
| Hepatorenal                                                                       | 412 (0.4)     |
| Jaundice                                                                          | 13794 (12.8)  |
| Spontaneous bacterial peritonitis                                                 | 1106 (1.0)    |
| <b>Mental health conditions, N (%)</b>                                            |               |



|                                             |              |
|---------------------------------------------|--------------|
| Depression                                  | 27464 (25.4) |
| Anxiety                                     | 9530 (8.8)   |
| Alcohol use                                 | 39268 (36.4) |
| Drug use                                    | 16910 (15.7) |
| History of homelessness                     | 9503 (8.8)   |
| <b>Physical health conditions, N (%)</b>    |              |
| Diabetes                                    | 54137 (50.2) |
| Chronic obstructive pulmonary disease       | 17326 (16.1) |
| Myocardial infarction                       | 1926 (1.8)   |
| Peripheral arterial disease                 | 4542 (4.2)   |
| Epilepsy                                    | 4537 (4.2)   |
| Heart Failure                               | 11332 (10.5) |
| Cancer                                      | 18164 (16.8) |
| Chronic kidney disease                      | 10872 (10.1) |
| Dialysis                                    | 2172 (2.0)   |
| <b>CirCom Score*, N (%)</b>                 |              |
| 0                                           | 25649 (23.8) |
| 1+0                                         | 28853 (26.7) |
| 1+1                                         | 20362 (18.9) |
| 3+0                                         | 5813 (5.4)   |
| 3+1                                         | 23807 (22.0) |
| 5+0                                         | 109 (0.1)    |
| 5+1                                         | 3346 (3.1)   |
| <b>Severe infection, N (%)</b>              | 13602 (12.6) |
| <b>Medication and treatment data, N (%)</b> |              |
| Antihypertensives                           | 65659 (60.8) |
| Analgesics                                  | 68835 (63.8) |
| Nonselective beta blockers                  | 8931 (8.3)   |
| Diuretics                                   | 48620 (45.0) |
| Anti-depressants                            | 43293 (40.1) |

|                                                                 |              |
|-----------------------------------------------------------------|--------------|
| Antibiotics                                                     | 48208 (44.7) |
| Endoscopic variceal ligation in the past year                   | 1156 (1.1)   |
| Paracentesis in the past year                                   | 2251 (2.1)   |
| Transjugular intrahepatic portosystemic shunts in the past year | 82 (0.1)     |
| <b>Body mass index</b>                                          |              |
| <18.5                                                           | 1915 (1.8)   |
| 18.5 to <25                                                     | 26810 (24.8) |
| 25 to <30                                                       | 36546 (33.9) |
| 30 or higher                                                    | 40211 (37.3) |
| Missing                                                         | 2457 (2.3)   |
| <b>Smoking status</b>                                           |              |
| Current                                                         | 39737 (36.8) |
| Former                                                          | 26842 (24.9) |
| Nonsmoker                                                       | 17792 (16.5) |
| Missing                                                         | 23568 (21.8) |
| Pulse, mean (SD)                                                | 77.5 (15.5)  |
| <b>Blood Pressure, mean (SD)</b>                                |              |
| Systolic blood pressure,                                        | 129.9 (18.7) |
| Diastolic blood pressure                                        | 76.6 (10.6)  |
| <b>Lipids, mg/dl, mean (SD)</b>                                 |              |
| High density lipoprotein                                        | 44.4 (15.6)  |
| Low density lipoprotein                                         | 88.3 (34.1)  |
| Total cholesterol                                               | 171.6 (33.6) |
| <b>Health care utilization, N (%)</b>                           |              |
| Prior history of cirrhosis related hospitalization              |              |
| In the past year                                                | 27609 (25.6) |
| Any time before index                                           | 37041 (34.3) |
| Prior history of hospitalization from any cause                 |              |
| In the past year                                                | 44143 (40.9) |
| Any time before index                                           | 71570 (66.3) |

|                                                                      |              |
|----------------------------------------------------------------------|--------------|
| Hospitalization from primary diagnosis of cirrhosis or complications | 10560 (9.8)  |
| At least one emergency room visit in the past year                   | 46450 (43.0) |
| # of outpatient visits in the past year                              |              |
| 0                                                                    | 4107 (3.8)   |
| 1                                                                    | 3062 (2.8)   |
| 2                                                                    | 2597 (2.4)   |
| 3+                                                                   | 98173 (91.0) |
| <b>Priority status,<sup>40</sup> N (%)</b>                           |              |
| 1-3                                                                  | 45150 (41.8) |
| 4-5                                                                  | 46405 (43.0) |
| 6-8                                                                  | 16038 (14.9) |
| Missing                                                              | 346 (0.3)    |

\*Circom: nonmetastatic cancer, metastatic cancer, hematologic cancer, substance abuse other than alcoholism, epilepsy, acute myocardial infarction, heart failure, peripheral arterial disease, chronic obstructive pulmonary disease, chronic kidney disease were pulled using most recent inpatient or outpatient diagnoses given in the 5 years before index date. Circom score was calculated by the algorithm<sup>20</sup> developed and validated by Jepsen et al. CirCom score uses a specific set of ICD-10 codes to define the conditions. We mapped these ICD-10 to ICD-9 codes to define conditions included in CirCom (as shown in Supplementary Table 1).

We used the Academy of Healthcare Research and Quality Clinical Classifications Software (CCS) to define the conditions that were not included in the CirCom score (such as diabetes, depression, anxiety, and alcohol use).

Abbreviations: CirCom, cirrhosis-specific comorbidity score; HBV, hepatitis B virus; HCV, hepatitis C virus

SI conversion factors: To convert albumin to g/L, multiply by 10.0; bilirubin to  $\mu\text{mol/L}$ , multiply by 17.104; creatinine to  $\mu\text{mol/L}$ , multiply by 88.4; hemoglobin to g/L, multiply by 10.0; platelet count to  $\times 10^9/\text{L}$ , multiply by 1.0; sodium to mmol/L, multiply by 1.0;

Unless otherwise indicated, data are expressed as number (percentage) of patients. Owing to missing data, percentages may not total 100.

**eTable 3. Sample Patients Profiles with 1- and 3-Year Mortality Based on Different Patient Characteristics**

| Age                      | Black race | Serum sodium (mEq/L) | Serum bilirubin (mg/dL) | Platelet count (10 <sup>3</sup> /μL) | Serum albumin (g/dL) | Hgb (g/dL) | AST/ALT ratio >2 | CirCom Score | HE | Ascites | HCC | Mortality risk | 95% CI     |
|--------------------------|------------|----------------------|-------------------------|--------------------------------------|----------------------|------------|------------------|--------------|----|---------|-----|----------------|------------|
| <b>1-year mortality</b>  |            |                      |                         |                                      |                      |            |                  |              |    |         |     |                |            |
| 55                       | 1          | 135                  | 2                       | 150                                  | 3.5                  | 12.2       | 0                | 1+0          | 0  | 1       | 0   | 0.12           | 0.12- 0.13 |
| 60                       | 1          | 130                  | 3                       | 200                                  | 3.2                  | 11.5       | 0                | 3+0          | 1  | 1       | 0   | 0.16           | 0.15- 0.17 |
| 60                       | 0          | 135                  | 3                       | 150                                  | 3.3                  | 12         | 0                | 1+1          | 0  | 0       | 0   | 0.18           | 0.17- 0.19 |
| 65                       | 0          | 130                  | 4                       | 200                                  | 3                    | 11         | 1                | 3+0          | 1  | 0       | 0   | 0.23           | 0.21- 0.25 |
| 70                       | 0          | 125                  | 5                       | 200                                  | 2.5                  | 10         | 1                | 3+1          | 0  | 0       | 0   | 0.45           | 0.43- 0.47 |
| 65                       | 1          | 125                  | 4                       | 150                                  | 2.5                  | 10.5       | 1                | 3+1          | 0  | 1       | 1   | 0.66           | 0.64- 0.68 |
| <b>3- year mortality</b> |            |                      |                         |                                      |                      |            |                  |              |    |         |     |                |            |
| 55                       | 1          | 135                  | 2                       | 150                                  | 3.5                  | 12.2       | 0                | 1+0          | 0  | 1       | 0   | 0.34           | 0.20- 0.52 |
| 60                       | 1          | 130                  | 3                       | 200                                  | 3.2                  | 11.5       | 0                | 3+0          | 1  | 1       | 0   | 0.41           | 0.25- 0.58 |
| 60                       | 0          | 135                  | 3                       | 150                                  | 3.3                  | 12         | 0                | 1+1          | 0  | 0       | 0   | 0.44           | 0.28- 0.62 |
| 65                       | 0          | 130                  | 4                       | 250                                  | 3                    | 11         | 1                | 3+0          | 1  | 0       | 0   | 0.52           | 0.34- 0.69 |
| 70                       | 0          | 125                  | 5                       | 200                                  | 2.5                  | 10         | 1                | 3+1          | 0  | 0       | 0   | 0.75           | 0.58- 0.85 |
| 65                       | 1          | 125                  | 4                       | 150                                  | 2.5                  | 10.5       | 1                | 3+1          | 0  | 1       | 1   | 0.87           | 0.77- 0.93 |

Hgb – hemoglobin. HE – hepatic encephalopathy. HCC – hepatocellular cancer

**eTable 4.** Scoring Intercepts and  $\beta$  Coefficients for Predictors in Final Model Predicting Mortality in Patients With Cirrhosis

| <b>Model Structure</b>                           |                                     |                         |                      |                           |                           |
|--------------------------------------------------|-------------------------------------|-------------------------|----------------------|---------------------------|---------------------------|
| <b>Scoring Intercepts (Person Period Hazard)</b> |                                     | <b><math>a_j</math></b> |                      |                           |                           |
|                                                  | Mortality in 1 Year                 | -.02                    |                      |                           |                           |
|                                                  | Mortality in Year 2                 | .756                    |                      |                           |                           |
|                                                  | Mortality in Year 3                 | .673                    |                      |                           |                           |
|                                                  | Mortality in Year 4                 | .628                    |                      |                           |                           |
|                                                  | Mortality in Year 5                 | .638                    |                      |                           |                           |
|                                                  | Mortality in Year 6                 | .652                    |                      |                           |                           |
|                                                  | Mortality in Year 7                 | .642                    |                      |                           |                           |
|                                                  | Mortality in Year 8                 | .679                    |                      |                           |                           |
| <b>Risk Predictors</b>                           |                                     | <b>B</b>                | <b>Relative Risk</b> | <b>95% CI lower limit</b> | <b>95% CI upper limit</b> |
|                                                  | Age                                 | .039                    | 1.04                 | 1.03                      | 1.04                      |
|                                                  | Black race                          | -.158                   | .87                  | .85                       | .89                       |
|                                                  | Serum sodium (meq/l)                | -.018                   | .98                  | .98                       | .99                       |
|                                                  | Serum bilirubin (mg/dl)             | .051                    | 1.05                 | 1.04                      | 1.05                      |
|                                                  | Platelet count (per 50/ml)          | -.062                   | .95                  | .94                       | .95                       |
|                                                  | Serum albumin (mg/dl)               | -.513                   | .63                  | .62                       | .64                       |
|                                                  | Hemoglobin (g/dl)                   | -.071                   | .94                  | .94                       | .94                       |
|                                                  | AST to ALT ratio $\geq 2$           | .269                    | 1.26                 | 1.24                      | 1.29                      |
|                                                  | Hepatic encephalopathy              | .208                    | 1.2                  | 1.18                      | 1.22                      |
|                                                  | Ascites                             | .304                    | 1.3                  | 1.28                      | 1.33                      |
|                                                  | Hepatocellular cancer               | .949                    | 2.18                 | 2.13                      | 2.23                      |
|                                                  | CirCom score 1+0 (ref = CirCom = 0) | .276                    | 1.27                 | 1.24                      | 1.3                       |
|                                                  | CirCom score 1+0                    | .487                    | 1.52                 | 1.48                      | 1.56                      |
|                                                  | CirCom score 3+0                    | .169                    | 1.16                 | 1.12                      | 1.21                      |
|                                                  | CirCom score 3+1                    | .649                    | 1.73                 | 1.69                      | 1.77                      |
|                                                  | CirCom score 5+0                    | .994                    | 2.26                 | 1.85                      | 2.71                      |
|                                                  | CirCom score 5+1                    | 1.321                   | 2.84                 | 2.74                      | 2.94                      |

|                           |       |     |     |     |
|---------------------------|-------|-----|-----|-----|
| Number of visits $\geq 3$ | -.291 | .77 | .75 | .79 |
|---------------------------|-------|-----|-----|-----|

We removed the intercept term when fitting discrete time models, and each person-period has a coefficient associated with the hazard of death in that time period. Using the first year as example, the expected person-period hazard for a patient would be  $a_{j=1} = -.02$  and the result from this estimate is an adjustment in the predicted risk by  $1/(1 + \exp(-a_{j=1})) = 1/(1 + \exp(-(-.02))) = .49$ . This probability of mortality in 1 year from cohort entry may seem quite high (~50/50 chance); yet, we note that many of the predictors are “protective” in the sense that they reduce risk to a value lower than .49. It is also important to note that that these person-period hazards are conditional probabilities in and of themselves as the probability of death in 2 years is conditional on the probability that one survives through 1 year, and so forth.

**eFigure 1.** Discrimination Slopes for the Full Logistic With LASSO (Full Path LASS), Partial Path LASSO, and Gradient Boosting (XGB) Models

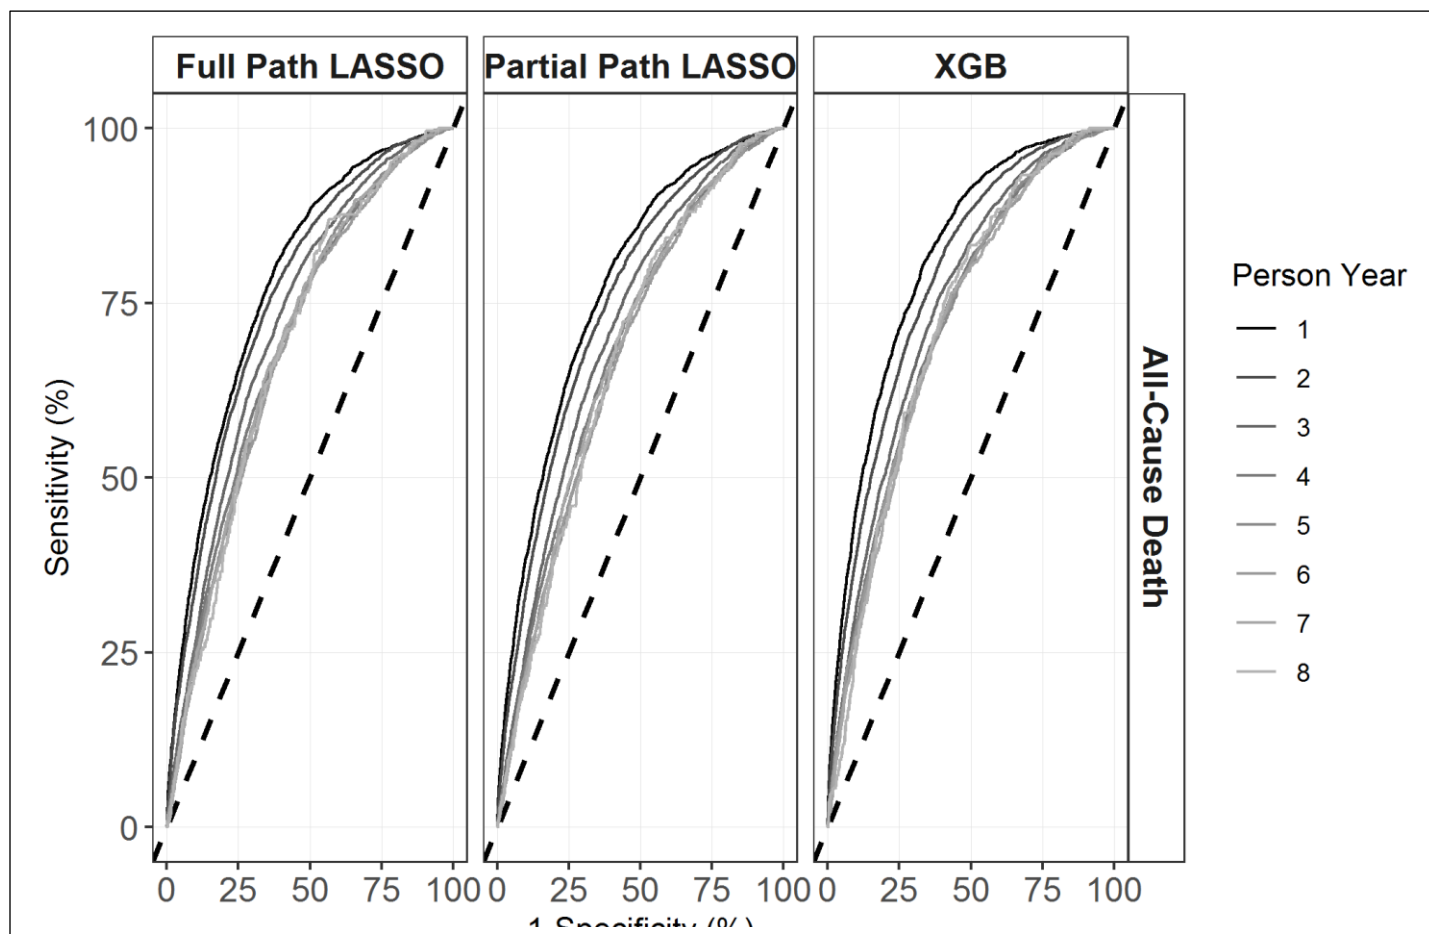

**eFigure 2.** Calibration Slopes for the Full Logistic With LASSO (Full Path LASS), Partial Path LASSO, and Gradient Boosting (XGB) Models

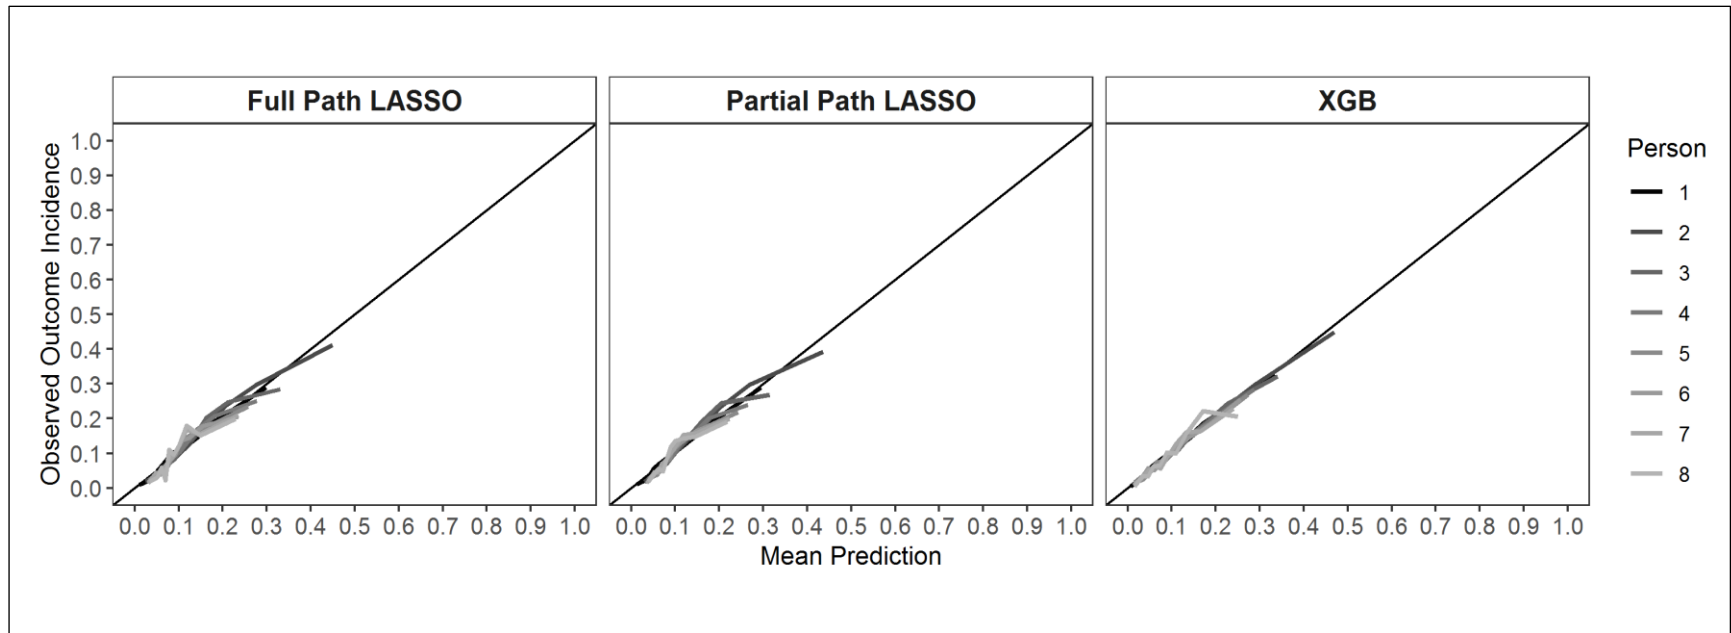



## eReferences.

1. Daniel J. Stekhoven, Peter Bühlmann, MissForest—non-parametric missing value imputation for mixed-type data, *Bioinformatics*, Volume 28, Issue 1, 1 January 2012, Pages 112–118
2. Anoop D. Shah, Jonathan W. Bartlett, James Carpenter, Owen Nicholas, Harry Hemingway, Comparison of Random Forest and Parametric Imputation Models for Imputing Missing Data Using MICE: A CALIBER Study, *American Journal of Epidemiology*, Volume 179, Issue 6, 15 March 2014, Pages 764–774
3. Hastie T, Tibshirani, R. Friedman, J. The Elements of Statistical Learning: Data Mining, Inference, and Prediction. In: Springer-Verlag; 2009: <https://web.stanford.edu/~hastie/ElemStatLearn/>
4. Muthukrishnan R, Rohini R. LASSO: A feature selection technique in predictive modeling for machine learning. Paper presented at: 2016 IEEE International Conference on Advances in Computer Applications (ICACA); 24-24 Oct. 2016, 2016. <https://ieeexplore.ieee.org/abstract/document/7887916>
